# Supplementary material for: Establishment and Comparison of Pathogenicity and Related Neurotropism in Two Age Groups of Immune Competent Mice, C57BL/6J Using an Indian Isolate of Chikungunya Virus (CHIKV)
Source: MDPI journal article supplement (doi:10.3390/v11060578), 2019-06-25
Supplement: s1 [file s1]

Suppl. Table 1: Evaluation of 15 CHIKV isolates for pathogenesis in 8 weeks old mice.

| Strain n<br>Name | 8 weeks old mice          |                              |                   |                           |                              |                   |                           |                              |                   |                           |                              |                   |                           |                              |                   |
|------------------|---------------------------|------------------------------|-------------------|---------------------------|------------------------------|-------------------|---------------------------|------------------------------|-------------------|---------------------------|------------------------------|-------------------|---------------------------|------------------------------|-------------------|
|                  | Day 3                     |                              |                   | Day 6                     |                              |                   | Day 9                     |                              |                   | Day 12                    |                              |                   | Day 15                    |                              |                   |
|                  | Morbidity (scale of 1-10) | Limb thickness (fold change) | Survivability (%) | Morbidity (scale of 1-10) | Limb thickness (fold change) | Survivability (%) | Morbidity (scale of 1-10) | Limb thickness (fold change) | Survivability (%) | Morbidity (scale of 1-10) | Limb thickness (fold change) | Survivability (%) | Morbidity (scale of 1-10) | Limb thickness (fold change) | Survivability (%) |
| CHIKV #01        | 4                         | 0.5×                         | 100               | 5.5                       | 2×                           | 100               | 6.25                      | 3×                           | 100               | 9                         | 4×                           | 66.66             | 10                        | 3.5×                         | 16.66             |
| CHIKV #02        | 0                         | No change                    | 100               | 2                         | No change                    | 100               | 3                         | No change                    | 100               | 4                         | 0.5×                         | 100               | 4                         | 0.2×                         | 100               |
| CHIKV #06        | 2                         | 2×                           | 100               |                           |                              |                   |                           |                              |                   | Dead                      |                              |                   |                           |                              |                   |
| CHIKV #14        | 0                         | No change                    | 100               | 2                         | No change                    | 100               | 3                         | 0.5×                         | 100               | 4                         | 0.2×                         | 100               | 4                         | 0.25×                        | 100               |
| CHIKV #15        | 0                         | No change                    | 100               | 0                         | No change                    | 100               | 2                         | 0.5×                         | 100               | 2                         | 0.1×                         | 100               | 3.56                      | 0.1×                         | 100               |
| CHIKV #07        | 0                         | No change                    | 100               | 2                         | No change                    | 100               | 3                         | 0.5×                         | 100               | 4                         | 0.2×                         | 100               | 4.25                      | 0.2×                         | 100               |
| CHIKV #10        | 0                         | No change                    | 100               | 3                         | No change                    | 100               | 3                         | No change                    | 100               | 4                         | No change                    | 100               | 5                         | No change                    | 100               |
| CHIKV #32        | 0                         | No change                    | 100               | 0                         | No change                    | 100               | 0                         | No change                    | 100               | 1                         | No change                    | 100               | 2                         | No change                    | 100               |
| CHIKV #40        | 0                         | No change                    | 100               | 0                         | No change                    | 100               | 0                         | No change                    | 100               | 1                         | No change                    | 100               | 2                         | No change                    | 100               |
| CHIKV #42        | 0                         | No change                    | 100               | 0                         | No change                    | 100               | 0                         | No change                    | 100               | 0                         | No change                    | 100               | 2                         | No change                    | 100               |
| CHIKV #11        | 3                         | No change                    | 100               | 4.5                       | 0.75×                        | 100               | 5.56                      | 1.25×                        | 100               | 7                         | 3×                           | 100               | 7                         | 2.5×                         | 83.33             |
| CHIKV #12        | 2                         | No change                    | 100               | 3.5                       | 1.5×                         | 100               | 4.25                      | 3×                           | 100               | 6.5                       | 3×                           | 100               | 6.5                       | 2×                           | 83.33             |
| CHIKV #20        | 2                         | No change                    | 100               | 4                         | 0.8×                         | 100               | 4                         | 1×                           | 100               | 5                         | 0.12×                        | 100               | 5                         | 0.1×                         | 100               |
| CHIKV #88        | 0                         | No change                    | 100               | 0                         | No change                    | 100               | 0                         | No change                    | 100               | 0                         | No change                    | 100               | 0                         | No change                    | 100               |
| CHIKV #112       | 0                         | No change                    | 100               | 0                         | No change                    | 100               | 0                         | No change                    | 100               | 0                         | No change                    | 100               | 2                         | No change                    | 100               |

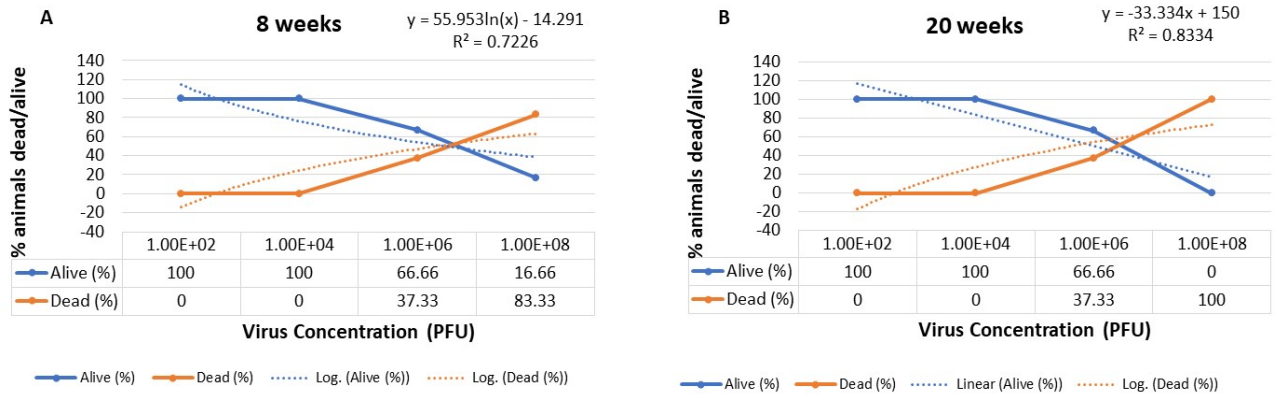

**Suppl. Fig. 1:** Determination of MID<sub>50</sub> for CHIKV#1 in 8 weeks and 20 weeks old infected mice. Each group of the study had eight animals (four male and four female) and the animals were observed for a period of 15 days and the percentage of animals dead/alive was calculated at 15 dpi before the termination of the study

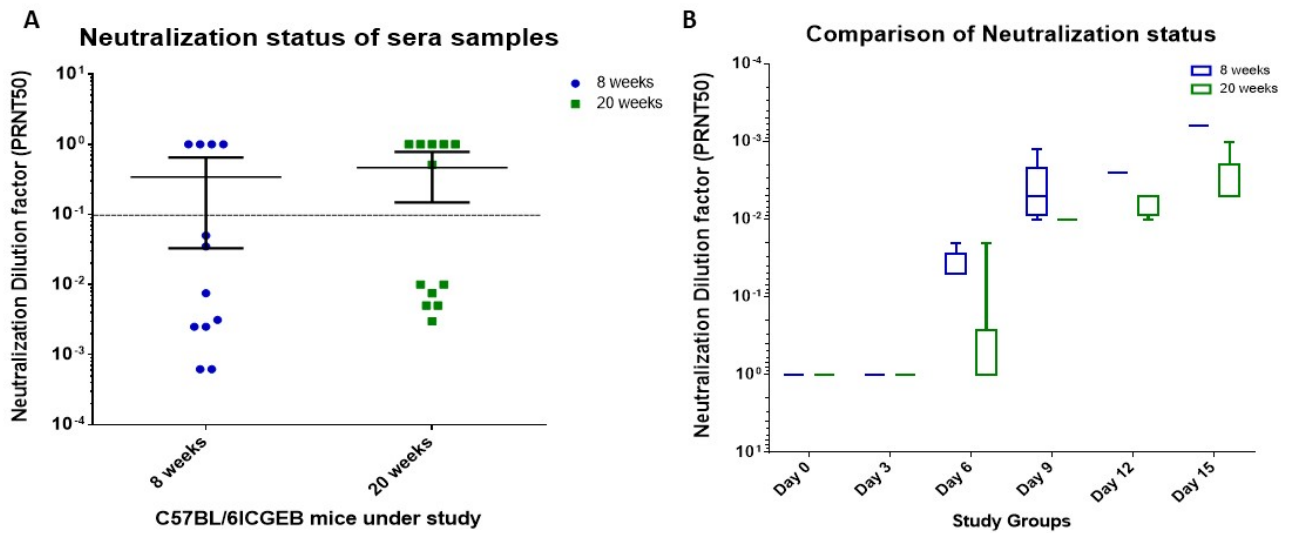

**Suppl. Fig 2:** Comparison of the neutralization status of the binding antibodies in 8 week vs. 20 weeks old mice (2a and 2b)

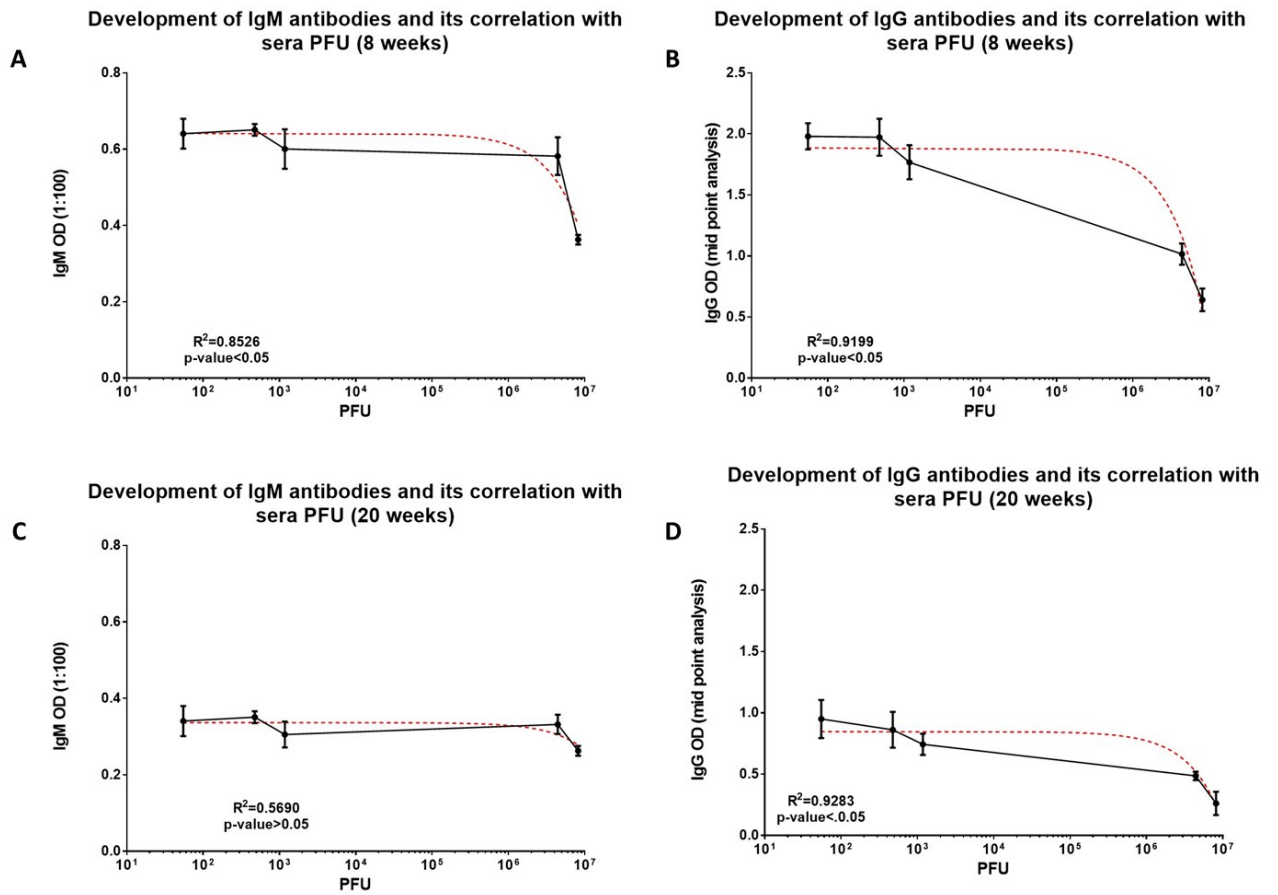

**Suppl. Fig 3:** Correlation of binding Abs and viral load in 8 weeks (3a and 3b) and 20 weeks old infected mice (3c and 3d).
